# Supplementary material
Source: MDPI journal article supplement (https://www.mdpi.com/2071-1050/12/5/1744)
Supplement: s1 [file s1]

## Sheet: Sheet1
	About the project			About the evaluation						Reported effects
Project name	Completion year	Size	Parking norm	Who did the evaluation?	Method	Control group	Before/after study	Parameters assessed	Type of report	Vehicle ownership	Mobility patterns	Other conclusions
Almedal terrace, Gothenburg	2016	145 appartments	0.33/apt.	Third party	Questionnaire	No	No	Mobility patterns Attitudes Car ownership Car sharing membership	Master thesis	70% own a car	PT 39% of trips; 37% state car main transport mode	Apartment size correlate with vehicle ownership
Embla, Umeå	2014	12,300 sqm non-residential	6/1000 sqm GFA	Property owner	Questionnaire	No	No	Mobility patterns Parking availability and cost Car/bike ownership	Travel survey	9 of 10 have access to car and bike	Bike to work: 49% summer & 22% winter; Drive to work 24% summer & 26 % during winter	discounted PT cards would incentives sustainable mobility (according to survey respondents)
Fullriggaren, Malmö	2013	636 appartments	0.8/apt	Third party, building company	Interviews, questionnaire	"Yes"	No	Mobility patterns Car ownership Car sharing membership Building companies "attitudes"	Master thesis, bachelor thesis, byggherrar	53% own a car (lower than full area); 54-60% members of carsharing	7 of 10 bike regularly	carsharing is not enough to handle mobility need
Hammarby Sjöstad, Stockholm	1994 - 2020	11,000 appartments	0.65/apt	Researcher	Travel survey, questionnaire	"Yes"	No	Mobility patterns Car ownership Car sharing membership	Academic, travel survey	210 cars/1000 inhabitants	trips share: 21% car; 52% PT; 27% biking
Kvillebäcken, Gothenburg	2013 - 2019	2,058 appartments	0.53/apt	Building company	Interviews, questionnaire	No	No	Mobility patterns Car and bike ownership Car sharing usage	Konsultrapport byggherrar + attitydundersökning	40% have access to a car	Commuting: 72% PT; 16% car; 8% bike and 4% walk	70% park in garage - 20%on the streets
Ohboy, Malmö	2017	55 appartments	0/apt	Building company	Questionnaire	No	No	Mobility patterns Mobility pattern change Mobility service usage Attitudes towards mobility services	Egen attitydundersökning		Increasing in biking	2/3 perceive a change in mobility
Stockholm Royal Seaport, Stockholm	2012 - 2030	12,000 appartments	0.5/apt	City	Questionnaire	No	No	Car and bike ownership	Konsultrapport Sweco för staden
Porslinsfabriken, Gothenburg	2012	509 appartments	0.57/apt	Researcher	Interviews, questionnaire	No	No	Mobility pattern change Mobility patterns Car ownership	Academic	20% reduction in car ownership	25% say they reduced car usage	no lack of parking due to surroundings
Florisdorf, Vienna	1999	244 appartments	0.1/apt	Researchers	Questionnaire	Yes	No	Car ownership Demographics Mobility patterns	Academic	73% didn't have cars previously; 24% gave up car	55% didn't use car at all (30% control); 700 km by car (10 979 control)	car free housing can be attractive
Stellwerk 60, Cologne	2005 - 2013	450 appartments	0.26/apt	Third party	Interviews, questionnaire	"Yes"	No	Car ownership Mobility patterns	Thesis	21% gave up car (66% already car free)	More PT distance travelled than comparison area
Vauban, Freiburg	1998 - 2003	2,000 appartments	0.5/apt	Researcher, third party	Questionnaire	Yes	No	Car ownership Car sharing membership Mobility patterns	Academic	150 cars/1000 inhabitants	16% car; 19% PT; 65% biking	81% of carfree households had prevously owned a car
Sihilcity, Zurich	2007	100,000 sqm non-residental	Approx 8.5/1000 sqm GFA	City	not specified	No	No	Mobility patterns	Consultancy report		70% PT,bike or walk; 30% car
HOA Haninge, Stockholm	2018	85 apartments	0.45/apt	Ressearcher	Questionnnaire, interviews	No	Yes - but low response rate	Mobility patterns Car ownership use of mobility services	Journal article	access to fewer cars	car no change; PT from 2 to 3 days/week	other factors influence car ownership as well; access to PT important
HOA Elvsjoe, Stockholm	2018	157 apartments	0.24/apt	Researcher	Questionnnaire, interviews	No	Yes - but low response rate	Mobility patterns Car ownership use of mobility services	Journal article	access to fewer cars	car use from 2 to 1 days/week; PT 5 to 4 days/week	other factors influence car ownership as well; access to PT important; many young residents that move away from home
HOA Viva, Gothenburg	2019	134 apartments	0/apt	Researcher/consultant	Questionnaire, interview	No	Yes - but low response rate	car ownership, mobility patterns, use of mobility services, satisfation	Conference proceeding/ consultant presentation	4 of 39 sold car; 7 consider selling	PT most common mode	parking access important in considering to sell car
Pool Quarter, Dorset	2007-2008	512 aparments	0.7/apt	Researcher	Questionnaire	No	No	car ownership, mobility patterns, attitudes	PhD-thesis	81% had a car; 1/4 reduced car ownership;	reported lower car use; more active modes	proximity to town center important
